# Supplementary material
Source: publisher site journal article supplement (https://www.dovepress.com/article/supplementary_file/622578/622578%20Supplementary%20Material.docx)
Supplement: Supplementary file 1 [file 622578%20Supplementary%20Material.docx]

**Supplementary Materials**

**Supplementary Table S1a: Demographic information of Mammary Hyperplasia patients**

*Clinical and demographic characteristics of five mammary hyperplasia patients, including Sample Id, Age ,Clinical Features.*

| **Sample Id** | **Age** | **Clinical Features** |
| --- | --- | --- |
| 40480 | 37 | Mammary hyperplasia with focal ductal epithelial hyperplasia showing cribriform pattern and partial apocrine metaplasia. |
| 39302 | 43 | Mammary hyperplasia with fibroadenoma formation and focal ductal epithelial hyperplasia. |
| 39282 | 41 | Mammary hyperplasia with intraductal papilloma formation. |
| 39262 | 37 | Mammary hyperplasia, stromal hyperplasia, hyalinization, and focal glandular hyperplasia. |
| 39202 | 46 | Mammary hyperplasia |

**Supplementary Table S1b:Demographic information of Breast Cancer patients**

*Clinical and demographic characteristics of five mammary Breast Cancer patients, including Sample Id, Age ,Tumor Type, Tumor Type,Clinical Features.*

| **Sample Id** | **Age** | **Tumor Type** | **Tumor Type** | **Clinical Features** |
| --- | --- | --- | --- | --- |
| 37659 | 43 | Invasive breast cancer | Grade 2 | No tumor at base resection margin, no tumor in nipple, no axillary metastasis. |
| 37136 | 53 | Invasive breast cancer | Grade 2 | No tumor at base resection margin, no tumor in nipple, no axillary metastasis. |
| 38293 | 43 | Invasive breast cancer | Grade 2 | No tumor at base resection margin, tumor in subcutaneous nipple, axillary metastasis. |
| 38642 | 59 | Invasive breast cancer | Grade 2 | No tumor at base resection margin, no tumor in nipple, axillary metastasis. |
| 36564 | 48 | Invasive breast cancer | Grade 2 | No definite nerve invasion, tumor thrombus in blood vessels. |

**Supplementary Table S2: Instrumental variables (8 SNPs, P < 5 × 10⁻⁶) for Seipin on Breast Cancer (ieu-a-1135) in mendelian randomization analysis**

*Eight single nucleotide polymorphisms (SNPs) selected as instrumental variables (IVs) at the genome-wide significance threshold of P < 5 × 10⁻⁶ for the association between Seipin (exposure, eqtl-a-ENSG00000168000) and breast cancer (outcome, ieu-a-1135) in the two-sample Mendelian randomization analysis.*

| **SNPs** | **CHR** | **POS** | **EA** | **OA** | **EAF** | **BETA** | **SE** | **P** | **F-STATISTICS** |
| --- | --- | --- | --- | --- | --- | --- | --- | --- | --- |
| rs112251597 | 11 | 62767952 | A | G | 0.026 | -0.435 | 0.037 | 0.000 | 136.689 |
| rs117991865 | 11 | 62416859 | A | G | 0.014 | -0.271 | 0.050 | 0.000 | 28.913 |
| rs12272560 | 11 | 62684777 | A | G | 0.039 | -0.350 | 0.031 | 0.000 | 130.357 |
| rs12418135 | 11 | 62556703 | T | G | 0.018 | -0.275 | 0.045 | 0.000 | 38.142 |
| rs148248716 | 11 | 62451457 | T | C | 0.027 | 1.204 | 0.036 | 0.000 | 1142.114 |
| rs78265569 | 1 | 2146165 | A | C | 0.073 | 0.106 | 0.023 | 0.000 | 21.392 |
| rs79678172 | 11 | 62609779 | A | G | 0.024 | 0.507 | 0.039 | 0.000 | 172.723 |
| rs826415 | 1 | 118153977 | G | T | 0.308 | 0.065 | 0.013 | 0.000 | 25.492 |

*Abbreviations: CHR, chromosome; POS, position; EA, effect allele; OA, other allele; EAF, effect allele frequency; BETA, beta coefficient; SE, standard error, F-STATISTICS, F-statistic indicating instrument strength. Note: For P values with small magnitudes, three decimal places are reserved.*

**Supplementary Table S3: Sensitivity analysis of the association between Seipin and Breast Cancer**

*Results of sensitivity analyses evaluating the robustness of the Mendelian randomization estimate for the causal effect of Seipin (eqtl-a-ENSG00000168000) on breast cancer (ieu-a-1135). Heterogeneity was assessed using Cochran’s Q test (P > 0.05 indicates no significant heterogeneity across IVs). Horizontal pleiotropy was evaluated via the MR-Egger intercept test (P > 0.05 indicates no directional pleiotropy). MR-PRESSO global test was performed to detect outlying variants (P > 0.05 indicates no significant pleiotropy). All P-values are non-significant, supporting the validity of the MR assumptions.*

| **Exposure (Seipin)** | **Outcome (breast cancer)** | **Heterogeneity (Cochran's Q)** | **Heterogeneity p-value** | **Pleiotropy_test (Egger_intercept)** | **Pleiotropy p-value** | **MR-PRESSO (RSSobs)** | **MR-PRESSO p-value** |
| --- | --- | --- | --- | --- | --- | --- | --- |
| eqtl-a-ENSG00000168000 | ieu-a-1135 | 3.962 | 0.682 | -0.007 | 0.663 | 6.045 | 0.759 |

**Supplementary Table S4: Immunohistochemistry grading of Seipin expression in Breast Cancer and Mammary Hyperplasia patient samples**

*Immunohistochemistry (IHC) grading of Seipin protein expression in breast cancer and mammary hyperplasia tissue samples. For each sample, cells were classified by staining intensity grade (1+, weak; 2+, moderate; 3+, strong). Mean Intensity represents the average cellular mask brightness for each grade. Count indicates the number of cells in each grade category; Percent shows the proportion of cells per grade.*

| **Sample** | **Sample ID** | **Grade** | **Mean Intensity** | **Count** | **Percent** |
| --- | --- | --- | --- | --- | --- |
| Breast  Cancer  Patients | 38642 | 1+ | 12.803 | 933 | 73.35% |
| 2+ | 20.755 | 333 | 26.18% |
| 3+ | 30.906 | 3 | 0.24% |
| 37136 | 1+ | 10.114 | 548 | 55.92% |
| 2+ | 23.745 | 175 | 17.86% |
| 3+ | 40.27 | 254 | 25.92% |
| 38293 | 1+ | 6.506 | 985 | 70.97% |
| 2+ | 23.072 | 382 | 27.52% |
| 3+ | 32.793 | 21 | 1.51% |
| 36564 | 1+ | 13.913 | 886 | 47.56% |
| 2+ | 22.163 | 870 | 46.70% |
| 3+ | 36.789 | 107 | 5.74% |
| 37659 | 1+ | 9.631 | 652 | 58.01% |
| 2+ | 24.056 | 280 | 24.91% |
| 3+ | 35.885 | 191 | 16.99% |
| Mammary Hyperplasia Patients | 39302 | 1+ | 9.062 | 568 | 35.66% |
| 2+ | 25.635 | 278 | 17.45% |
| 3+ | 38.919 | 740 | 46.45% |
| 40480 | 1+ | 12.047 | 201 | 14.75% |
| 2+ | 23.498 | 156 | 11.45% |
| 3+ | 55.004 | 1005 | 73.73% |
| 39202 | 1+ | 12.67 | 101 | 7.77% |
| 2+ | 22.785 | 96 | 7.38% |
| 3+ | 64.766 | 1101 | 84.69% |
| 39262 | 1+ | 12.925 | 421 | 27.00% |
| 2+ | 24.651 | 375 | 24.05% |
| 3+ | 40.035 | 763 | 48.94% |
| 39282 | 1+ | 12.489 | 217 | 16.69% |
| 2+ | 23.74 | 176 | 13.54% |
| 3+ | 54.56 | 900 | 69.23% |

**Supplementary Figure S1: Immunohistochemical negative control staining of mammary hyperplasia tissues**


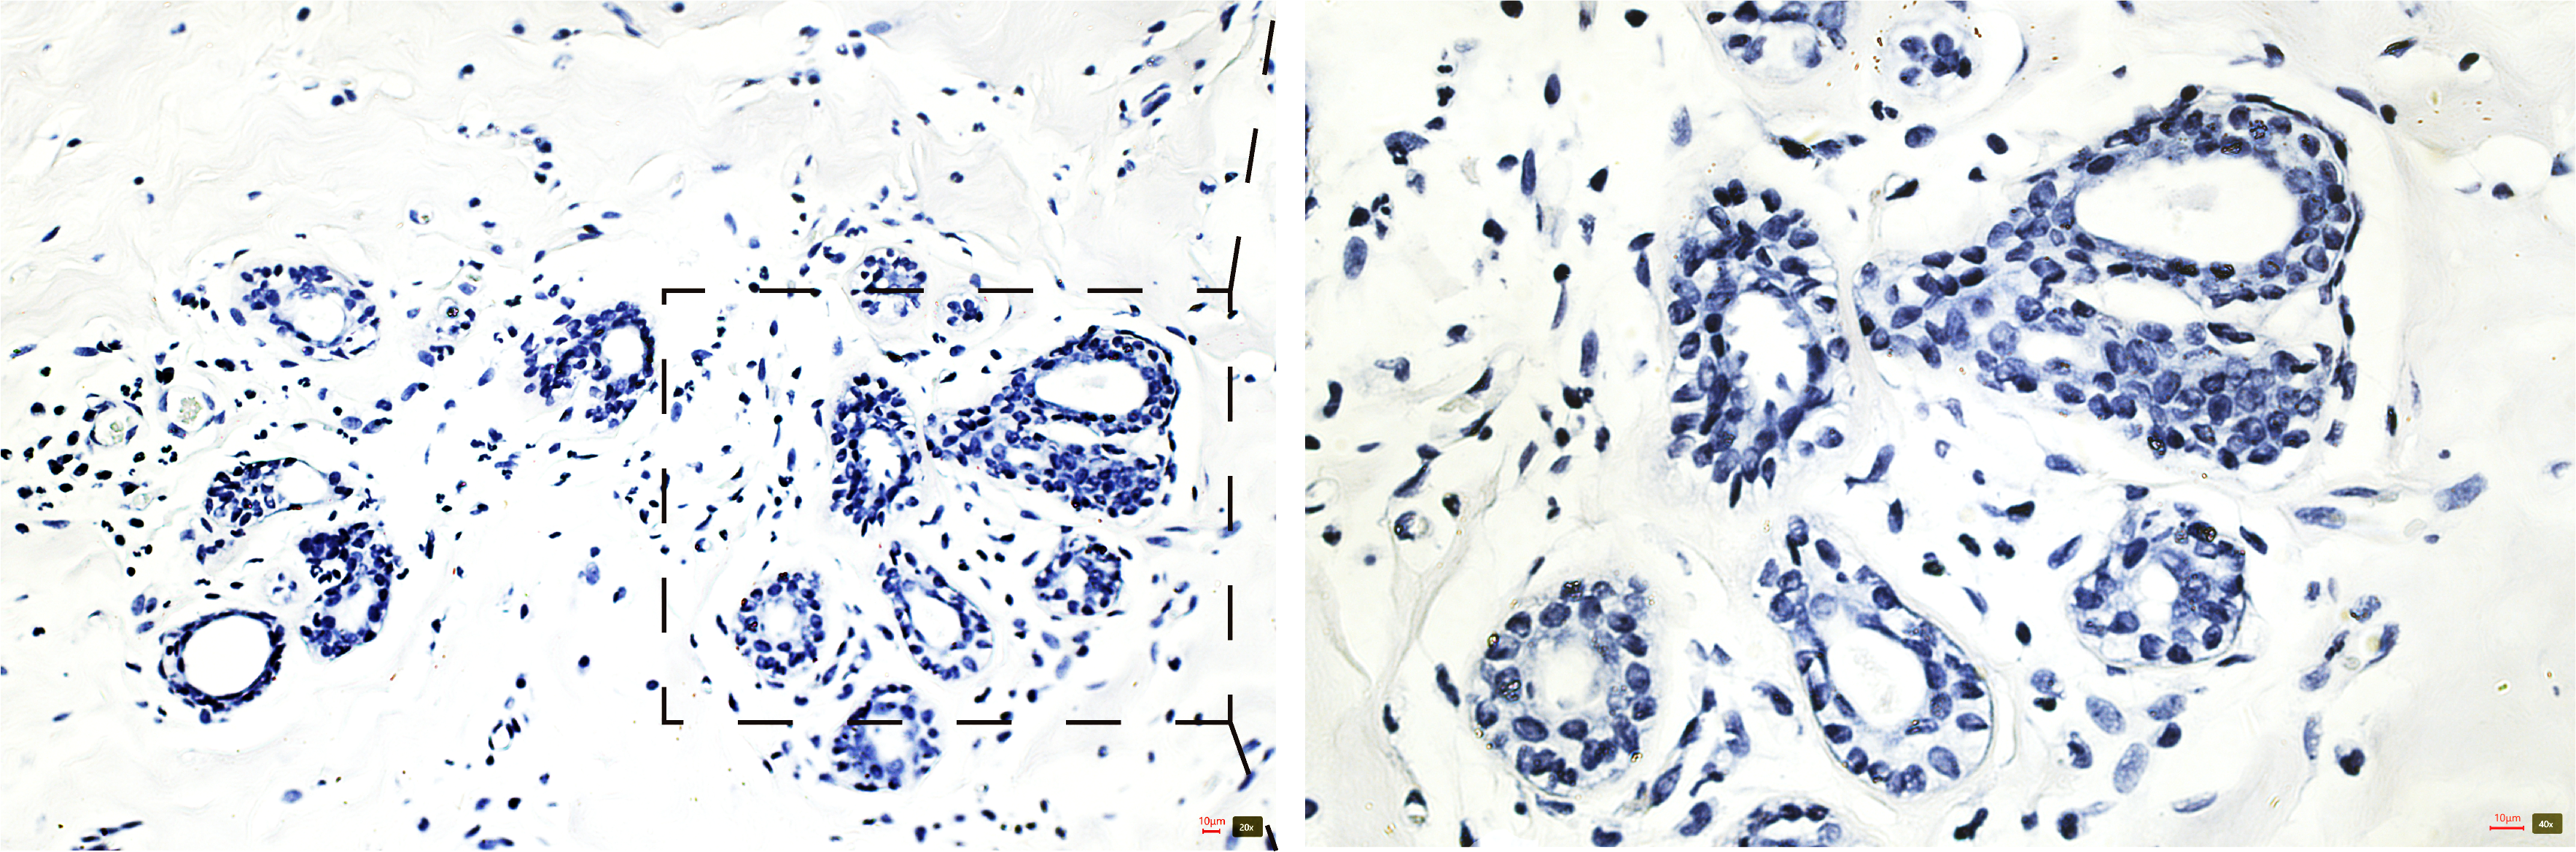


*Figure S1. Immunohistochemical negative control staining of mammary hyperplasia tissues.*

*Negative controls were prepared by omission of the primary antibody. The left panel is captured*

*at 100× original magnification, and the right panel at 200× original magnification. Scale bars correspond to 10 μm.*
